# Supplementary material
Source: ML conference proceedings conference paper supplement (https://proceedings.neurips.cc/paper_files/paper/2020/hash/2c29d89cc56cdb191c60db2f0bae796b-Abstract.html)
Supplement: Supplementary file [file 2c29d89cc56cdb191c60db2f0bae796b-Supplemental.zip]

# Thanks for participating in our study!

You were selected as a possible participant in this study because you are an MTurk worker, and your participation in this research study is voluntary.

## Please read:

For each task, you'll see an **image** and an **Artificial Intelligence (AI) prediction** of what is in the image.

First, we want to know if you think the AI was correct in its decision.

Next, there will be two methods explaining why the AI made this decision.

We want your opinion on **which is a better explanation** for this decision.

Please be sure to select one of the methods for every image.

Note: The images are a low resolution. Please do your best.

---

## Task 1

**An AI algorithm thinks this is a horse.**

horse?

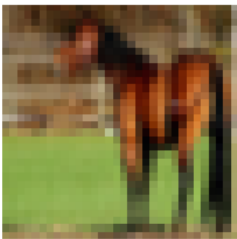

**Correctness:** Do you think the AI classified this image correctly?

☐ Yes

☐ No

## Explanation 1: Hot Pixels

These are the pixels the AI thinks are important. Red indicates important areas.

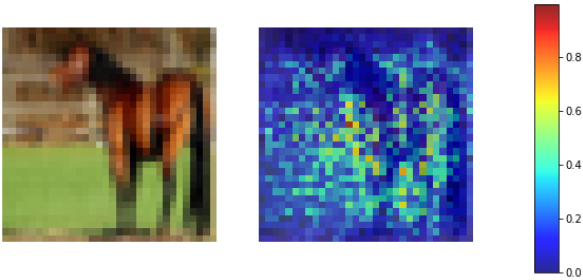

## Explanation 2: Outline

The AI outlined the important parts of this image.

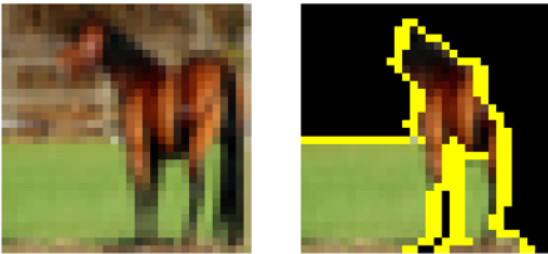

**Which explanation is better?**

- ☐ Hot Pixels (top)
- ☐ Outline (bottom)

---

## Task 2

**An AI algorithm thinks this is a dog.**

dog?

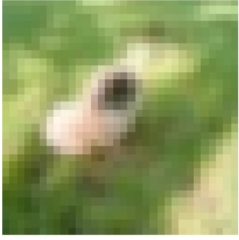

**Correctness:** Do you think the AI classified this image correctly?

☐ Yes

☐ No

## Explanation 1: Heatmap

Here is a heatmap of what the AI think is important. Red indicates important areas.

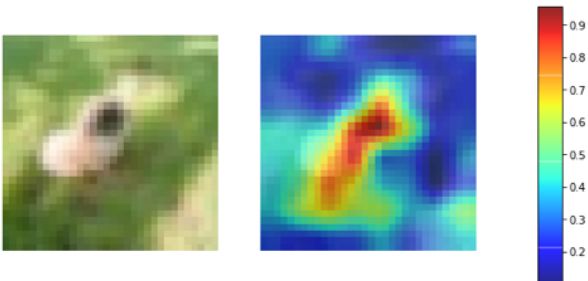

## Explanation 2: Masked Image

The visible parts are what the AI thinks are important

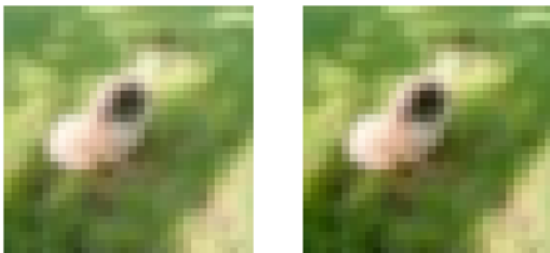

**Which explanation is better?**

- ☐ Heatmap (top)
- ☐ Masked Image (bottom)

## Task 3

**An AI algorithm thinks this is a truck.**

truck?

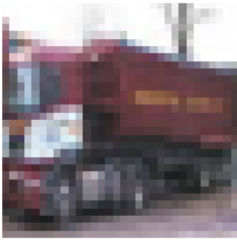

**Correctness:** Do you think the AI classified this image correctly?

- ☐ Yes
- ☐ No

## Explanation 1: Training Examples

The AI thinks this image is similar to other known images of trucks.

truck?

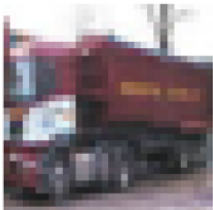

truck

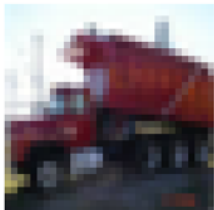

truck

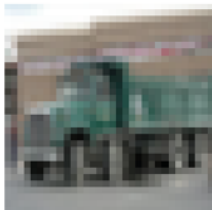

truck

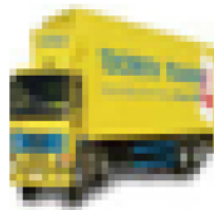

## Explanation 2: Outline

The AI outlined the important parts of this image.

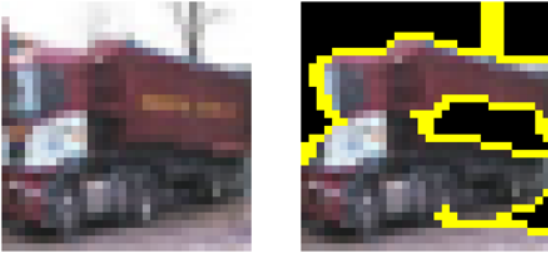

**Which explanation is better?**

- ☐ Training Examples (top)
- ☐ Outline (bottom)

---

## Task 4

**An AI algorithm thinks this is a dog.**

dog?

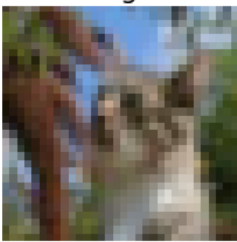

**Correctness:** Do you think the AI classified this image correctly?

- ☐ Yes
- ☐ No

## Explanation 1: Training Examples

The AI thinks this image is similar to other known images of dogs.

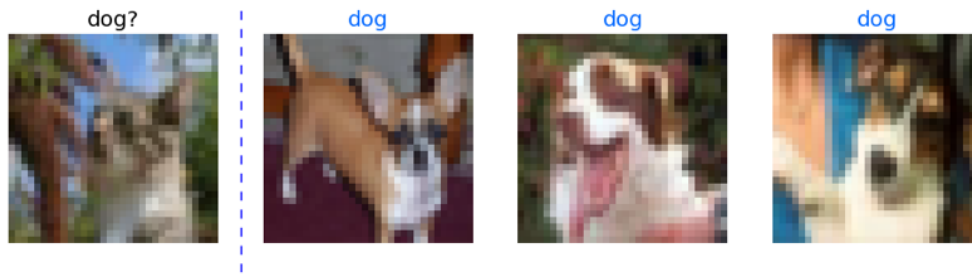

## Explanation 2: Heatmap

Here is a heatmap of what the AI think is important. Red indicates important areas.

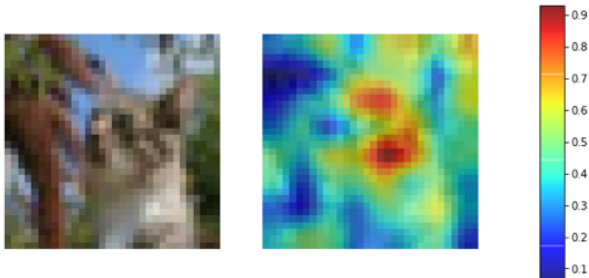

**Which explanation is better?**

- ☐ Training Examples (top)
- ☐ Heatmap (bottom)

---

## Task 5

**An AI algorithm thinks this is a frog.**

frog?

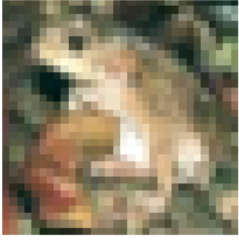

**Correctness:** Do you think the AI classified this image correctly?

☐ Yes

☐ No

## Explanation 1: Heatmap

Here is a heatmap of what the AI think is important. Red indicates important areas.

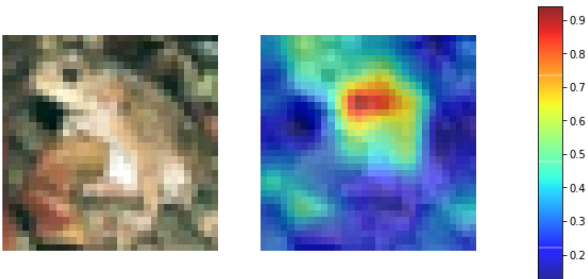

## Explanation 2: Outline

The AI outlined the important parts of this image.

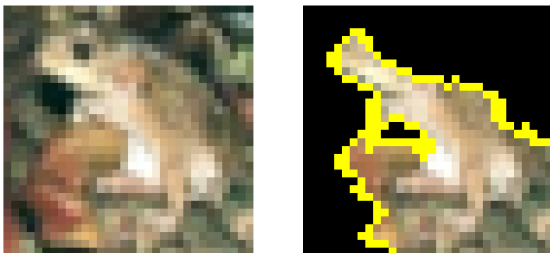

**Which explanation is better?**

- ☐ Heatmap (top)
- ☐ Outline (bottom)

## Task 6

**An AI algorithm thinks this is a truck.**

truck?

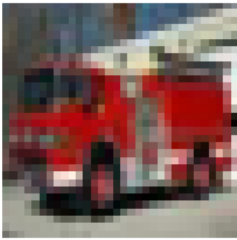

**Correctness:** Do you think the AI classified this image correctly?

- ☐ Yes
- ☐ No

### Explanation 1: Masked Image

The visible parts are what the AI thinks are important

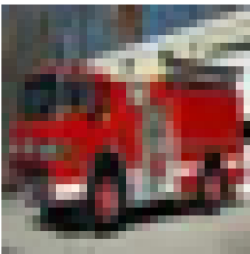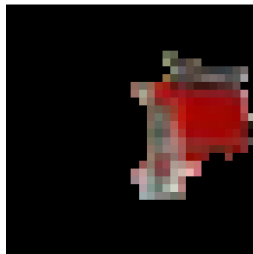



## Explanation 2: Hot Pixels

These are the pixels the AI thinks are important. Red indicates important areas.

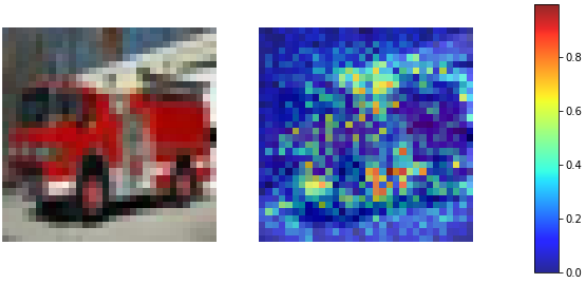

**Which explanation is better?**

- ☐ Masked Image (top)
- ☐ Hot Pixels (bottom)

---

## Task 7

**An AI algorithm thinks this is a airplane.**

airplane?

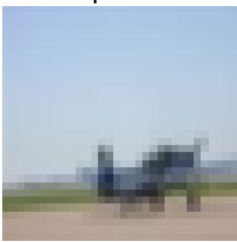

**Correctness:** Do you think the AI classified this image correctly?

- ☐ Yes
- ☐ No

## Explanation 1: Positive/Negative Analysis

The AI decision was influenced positively by red pixels and negatively by blue pixels.

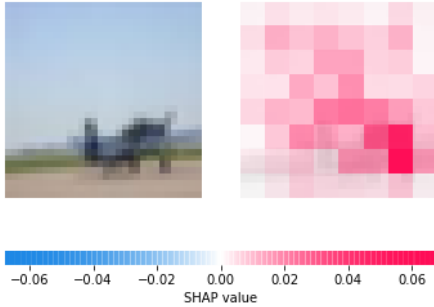

## Explanation 2: Masked Image

The visible parts are what the AI thinks are important

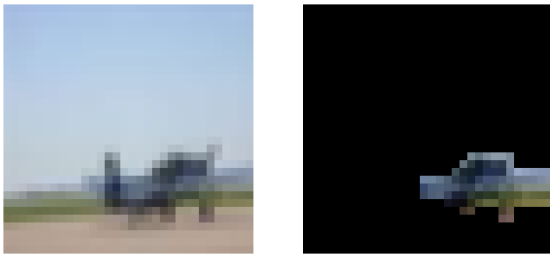

**Which explanation is better?**

- ☐ Positive/Negative Analysis (top)
- ☐ Masked Image (bottom)

## Task 8

**An AI algorithm thinks this is a bird.**

bird?

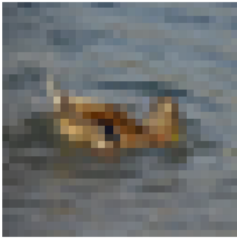

**Correctness:** Do you think the AI classified this image correctly?

☐ Yes

☐ No

## Explanation 1: Heatmap

Here is a heatmap of what the AI think is important. Red indicates important areas.

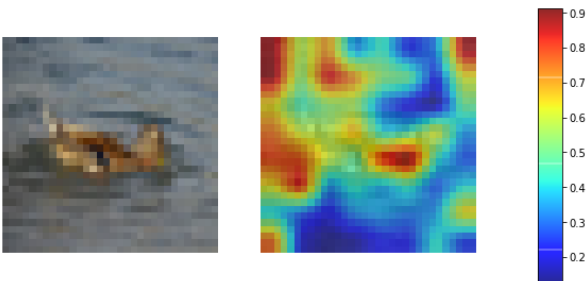

## Explanation 2: Positive/Negative Analysis

The AI decision was influenced positively by red pixels and negatively by blue pixels.

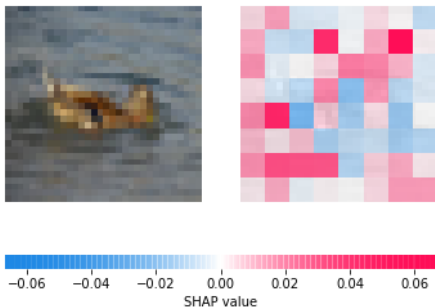

**Which explanation is better?**

- ☐ Heatmap (top)
- ☐ Positive/Negative Analysis (bottom)

## Task 9

**An AI algorithm thinks this is a horse.**

horse?

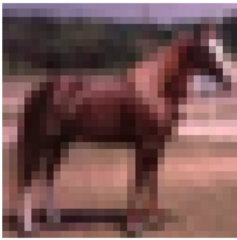

**Correctness:** Do you think the AI classified this image correctly?

- ☐ Yes
- ☐ No

### Explanation 1: Positive/Negative Analysis

The AI decision was influenced positively by red pixels and negatively by blue pixels.

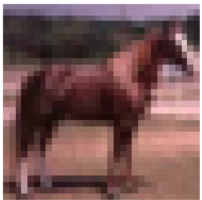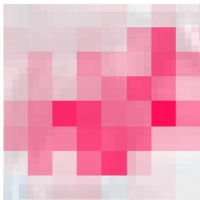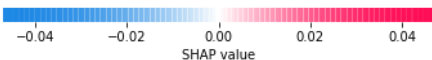

## Explanation 2: Hot Pixels

These are the pixels the AI thinks are important. Red indicates important areas.

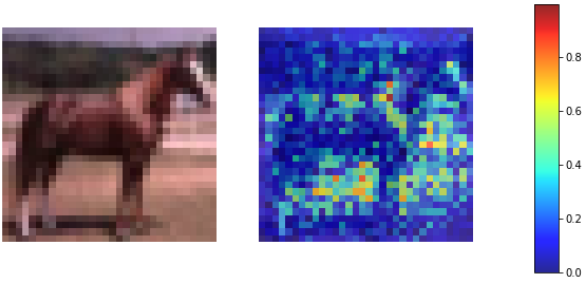

**Which explanation is better?**

- ☐ Positive/Negative Analysis (top)
- ☐ Hot Pixels (bottom)

---

## Task 10

**An AI algorithm thinks this is a automobile.**

automobile?

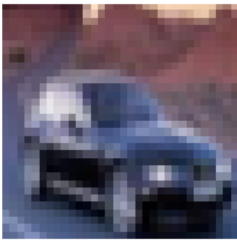

**Correctness:** Do you think the AI classified this image correctly?

- ☐ Yes
- ☐ No

## Explanation 1: Training Examples

The AI thinks this image is similar to other known images of automobiles.

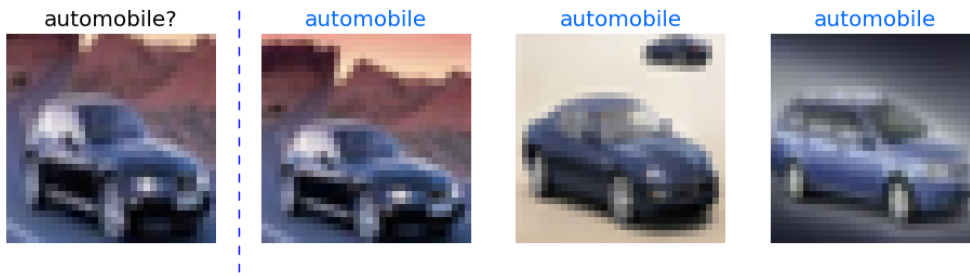

## Explanation 2: Masked Image

The visible parts are what the AI thinks are important

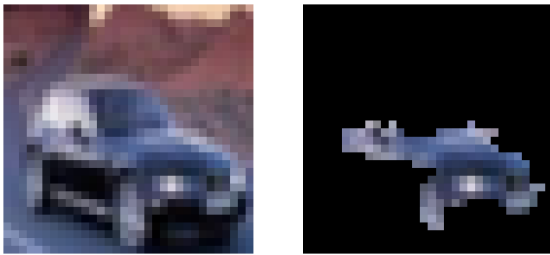

**Which explanation is better?**

- ☐ Training Examples (top)
- ☐ Masked Image (bottom)

---

## Task 11

**An AI algorithm thinks this is a ship.**

ship?

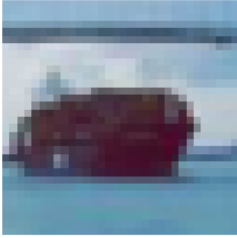

**Correctness:** Do you think the AI classified this image correctly?

☐ Yes

☐ No

## Explanation 1: Outline

The AI outlined the important parts of this image.

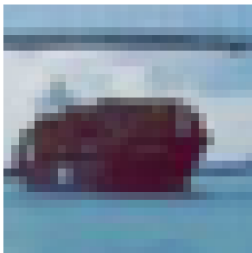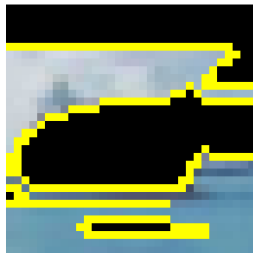

## Explanation 2: Masked Image

The visible parts are what the AI thinks are important

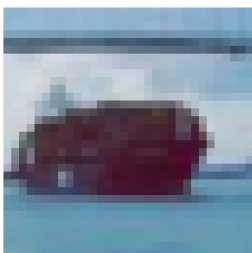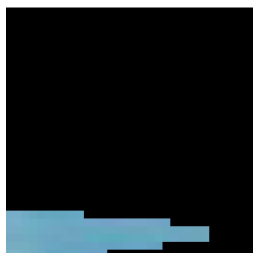

**Which explanation is better?**

- ☐ Outline (top)
- ☐ Masked Image (bottom)

## Task 12

**An AI algorithm thinks this is a frog.**

frog?

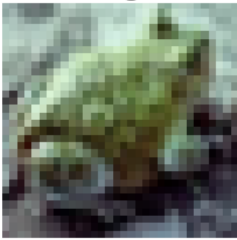

**Correctness:** Do you think the AI classified this image correctly?

- ☐ Yes
- ☐ No

### Explanation 1: Outline

The AI outlined the important parts of this image.

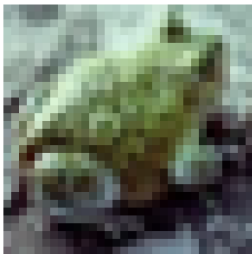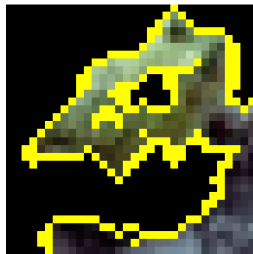



## Explanation 2: Positive/Negative Analysis

The AI decision was influenced positively by red pixels and negatively by blue pixels.

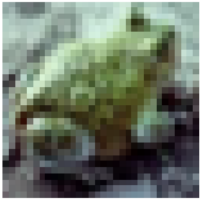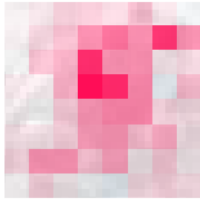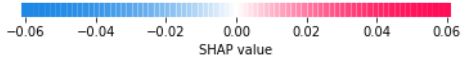

**Which explanation is better?**

- ☐ Outline (top)
- ☐ Positive/Negative Analysis (bottom)

## Task 13

**An AI algorithm thinks this is a airplane.**

airplane?

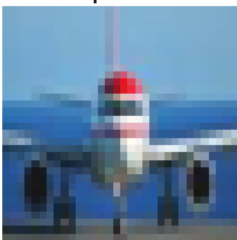

**Correctness:** Do you think the AI classified this image correctly?

- ☐ Yes
- ☐ No

## Explanation 1: Hot Pixels

These are the pixels the AI thinks are important. Red indicates important areas.

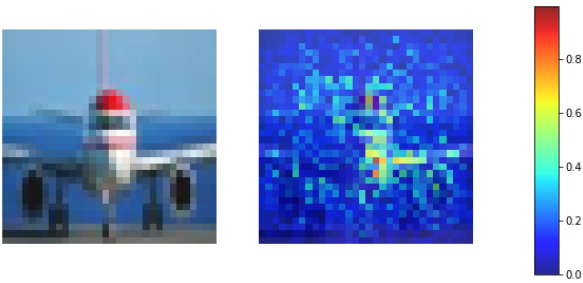

## Explanation 2: Training Examples

The AI thinks this image is similar to other known images of airplanes.

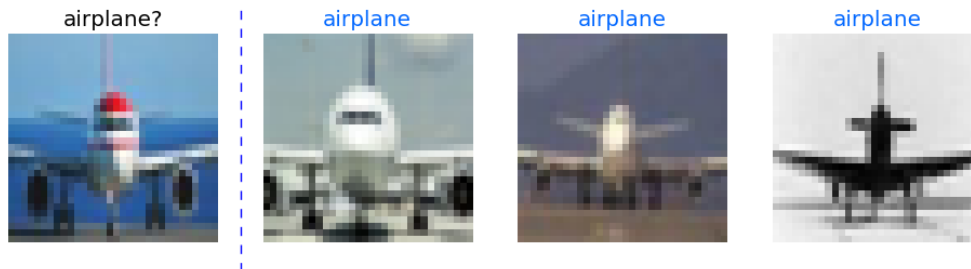

**Which explanation is better?**

- ☐ Hot Pixels (top)
- ☐ Training Examples (bottom)

---

## Task 14

**An AI algorithm thinks this is a bird.**

bird?

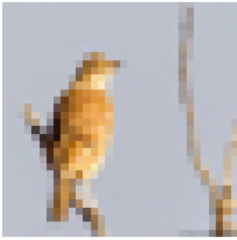

**Correctness:** Do you think the AI classified this image correctly?

☐ Yes

☐ No

## Explanation 1: Training Examples

The AI thinks this image is similar to other known images of birds.

bird?

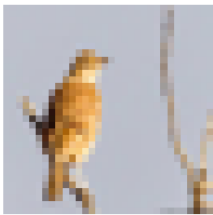

bird

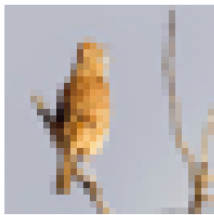

bird

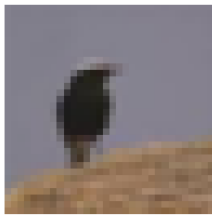

bird

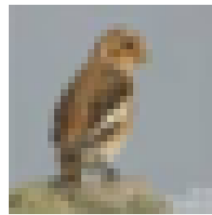

## Explanation 2: Positive/Negative Analysis

The AI decision was influenced positively by red pixels and negatively by blue pixels.

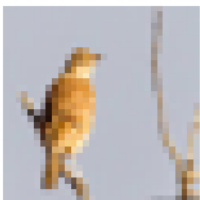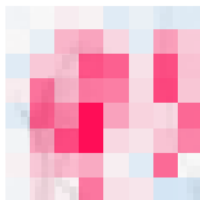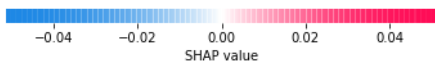

**Which explanation is better?**

- ☐ Training Examples (top)
- ☐ Positive/Negative Analysis (bottom)

## Task 15

**An AI algorithm thinks this is a deer.**

deer?

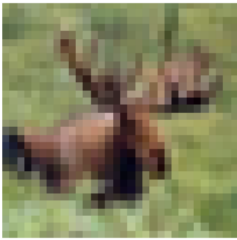

**Correctness:** Do you think the AI classified this image correctly?

- ☐ Yes
- ☐ No

### Explanation 1: Heatmap

Here is a heatmap of what the AI thinks is important. Red indicates important areas.

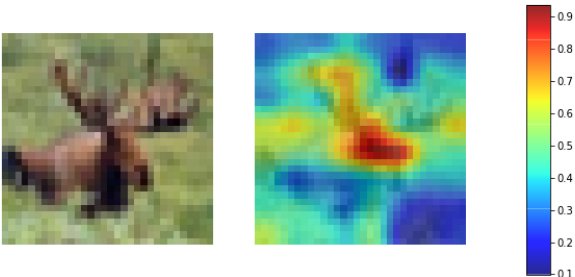

## Explanation 2: Hot Pixels

These are the pixels the AI thinks are important. Red indicates important areas.

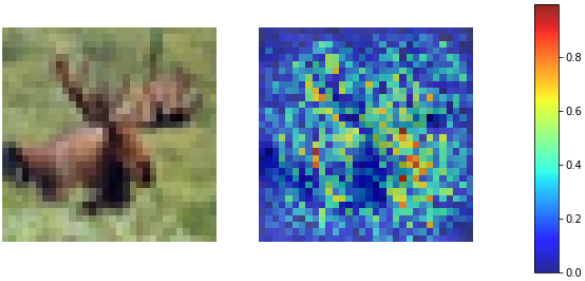

**Which explanation is better?**

- ☐ Heatmap (top)
- ☐ Hot Pixels (bottom)

---

Note: only click submit once, or your entry may be lost.

Submit
