# Supplementary material
Source: ML conference proceedings conference paper supplement (https://proceedings.neurips.cc/paper_files/paper/2020/hash/2c29d89cc56cdb191c60db2f0bae796b-Abstract.html)
Supplement: Supplementary file [file 2c29d89cc56cdb191c60db2f0bae796b-Supplemental.zip]

# Thanks for participating in our study!

You were selected as a possible participant in this study because you are an MTurk worker, and your participation in this research study is voluntary.

## Please read:

For each task, you'll watch an audio clip from someone speaking a word. An **Artificial Intelligence (AI) prediction** is trying to determine what word they are saying.

The person may say one of the following words: "yes", "no", "on", "off", "up", "down", "left", "right", "stop", "go".

First, we want to know if the AI was correct in its decision.

Next, there will be two methods explaining why the AI made this decision.

We want your opinion on **which is a better explanation** for this decision.

Please be sure to select one of the methods for every task.

NOTE: The videos may load slow, or may appear green. Please click them and they should play.

---

## Task 1

**An AI algorithm thinks this person is saying "right".**

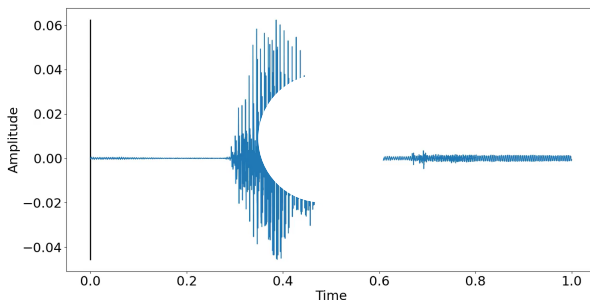

**Correctness:** Did the AI classify this word correctly?

☐ Yes

☐ No

## Explanation 1: Heatmap

Here is a heatmap of where in the audio the AI thinks are most important.

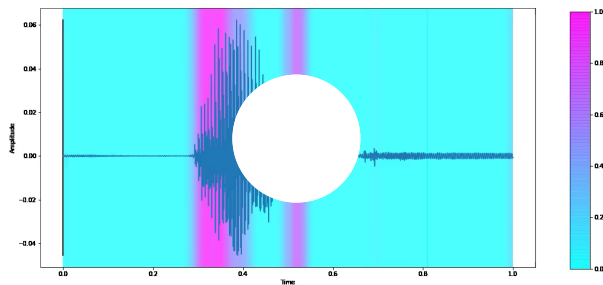

## Explanation 2: Training Examples

The AI thinks this audio is similar to these three other known examples of someone saying 'right'.

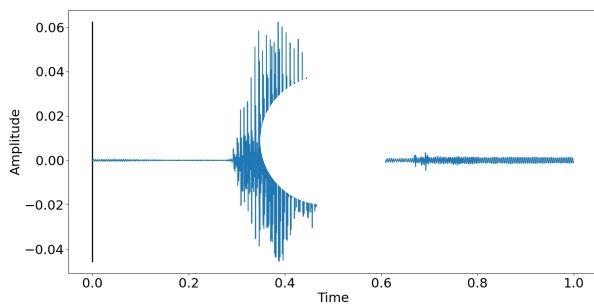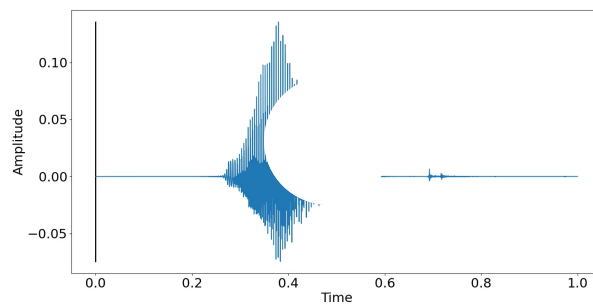

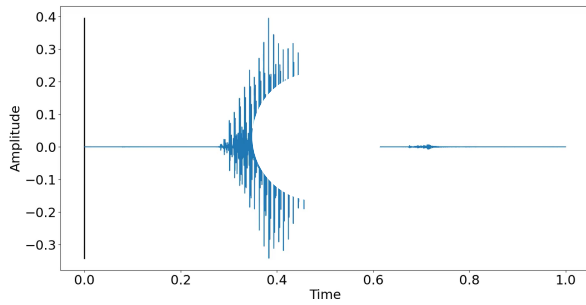

**Which explanation is better?**

- ☐ Heatmap (top)
- ☐ Training Examples (bottom)

## Task 2

**An AI algorithm thinks this person is saying "yes".**

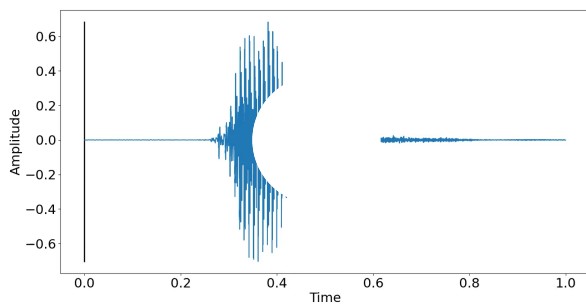

**Correctness:** Did the AI classify this word correctly?

☐ Yes

☐ No

## Explanation 1: Heatmap

Here is a heatmap of where in the audio the AI thinks are most important.

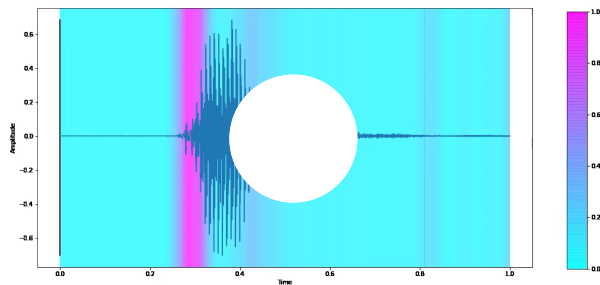

## Explanation 2: Positive/Negative Analysis

The AI decision was influenced positively by the magenta areas and negatively by blue areas.

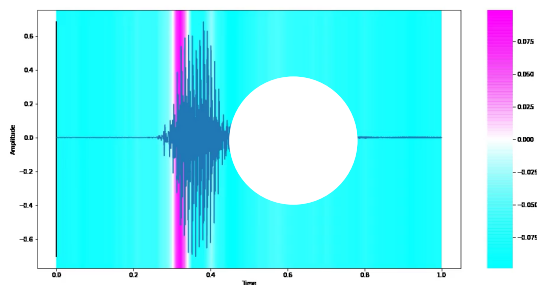

**Which explanation is better?**

- ☐ Heatmap (top)
- ☐ Positive/Negative Analysis (bottom)

## Task 3

**An AI algorithm thinks this person is saying "down".**

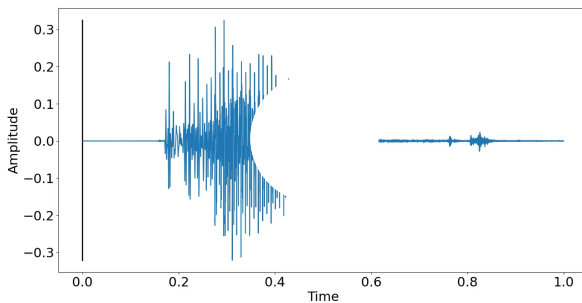

**Correctness:** Did the AI classify this word correctly?

- ☐ Yes
- ☐ No

## Explanation 1: Hot Pixels

Magenta indicates the exact moments the AI thinks are important.

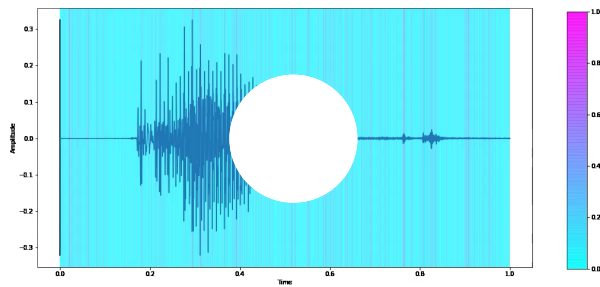

## Explanation 2: Positive/Negative Analysis

The AI decision was influenced positively by the magenta areas and negatively by blue areas.

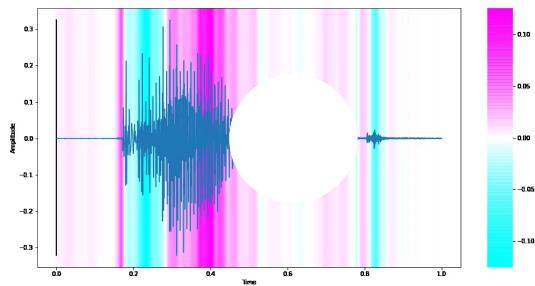

**Which explanation is better?**

- ☐ Hot Pixels (top)
- ☐ Positive/Negative Analysis (bottom)

## Task 4

**An AI algorithm thinks this person is saying "off".**

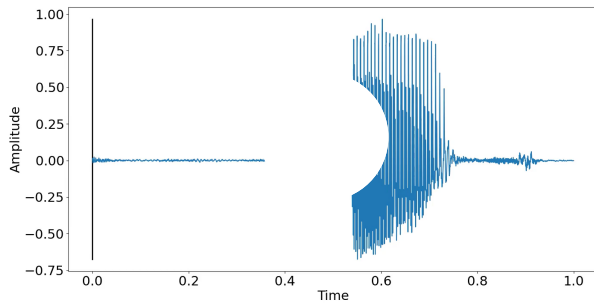

**Correctness:** Did the AI classify this word correctly?

☐ Yes

☐ No

## Explanation 1: Hot Pixels

Magenta indicates the exact moments the AI thinks are important.

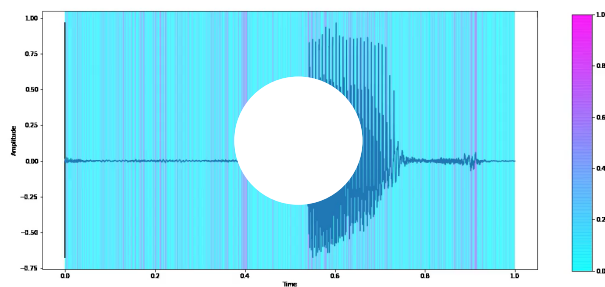

## Explanation 2: Training Examples

The AI thinks this audio is similar to these three other known examples of someone saying 'off'.

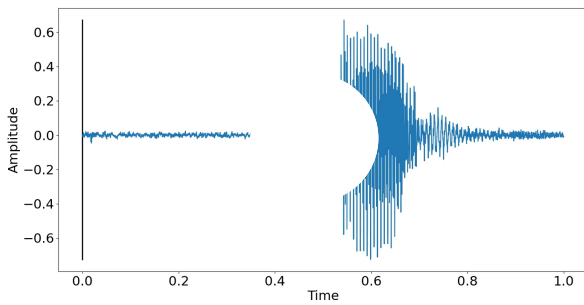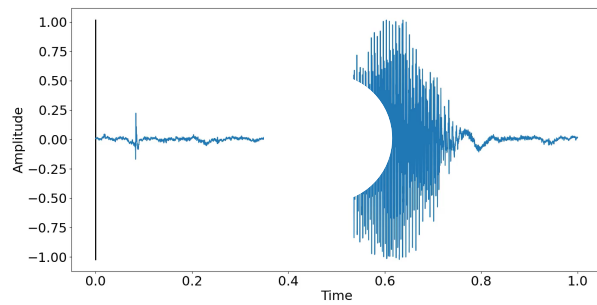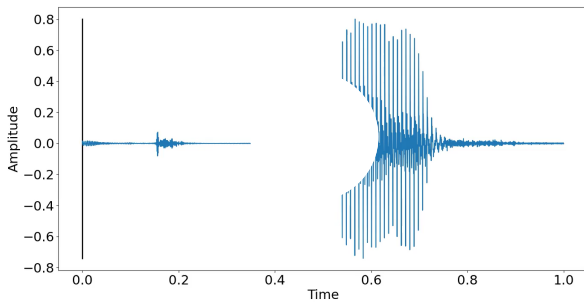

**Which explanation is better?**

- ☐ Hot Pixels (top)
- ☐ Training Examples (bottom)

## Task 5

An AI algorithm thinks this person is saying "up".



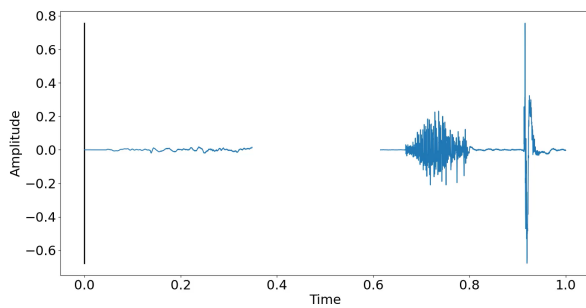

**Correctness:** Did the AI classify this word correctly?

☐ Yes

☐ No

## Explanation 1: Hot Pixels

Magenta indicates the exact moments the AI thinks are important.

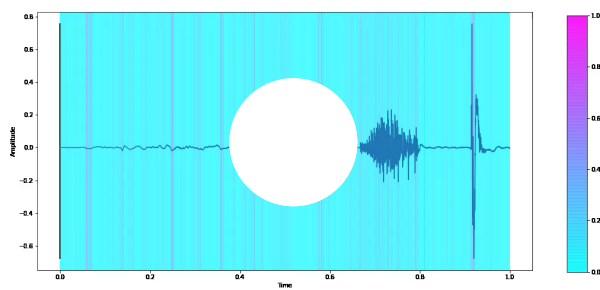

## Explanation 2: Heatmap

Here is a heatmap of where in the audio the AI thinks are most important.

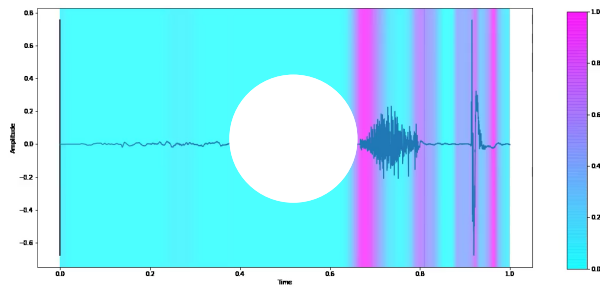

Which explanation is better?

- ☐ Hot Pixels (top)
- ☐ Heatmap (bottom)

## Task 6

An AI algorithm thinks this person is saying "down".

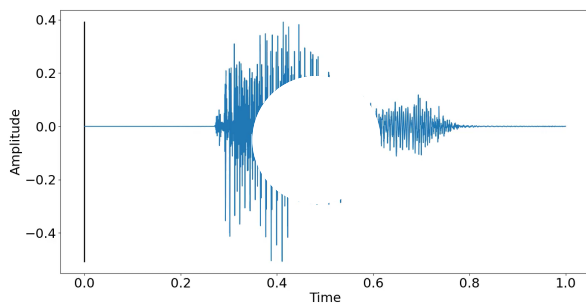

**Correctness:** Did the AI classify this word correctly?

☐ Yes

☐ No

## Explanation 1: Training Examples

The AI thinks this audio is similar to these three other known examples of someone saying 'down'.

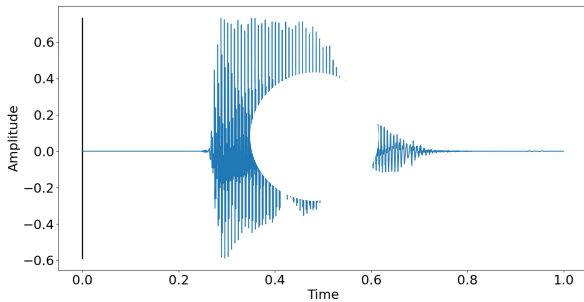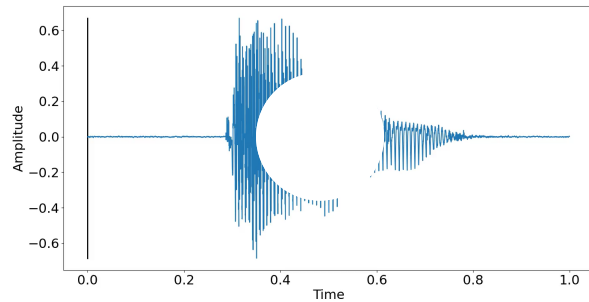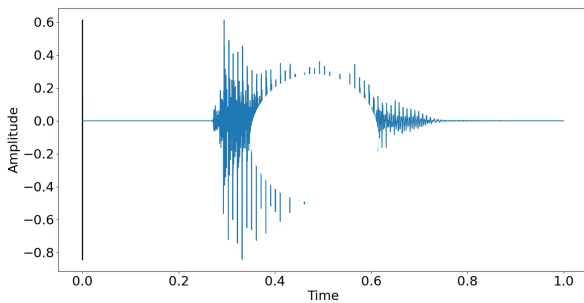

## Explanation 2: Positive/Negative Analysis

The AI decision was influenced positively by the magenta areas and negatively by blue areas.

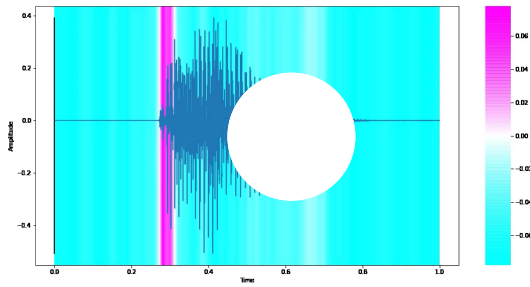

**Which explanation is better?**

- ☐ Training Examples (top)
- ☐ Positive/Negative Analysis (bottom)

Note: only click submit once, or your entry may be lost.

Submit
