# Supplementary material
Source: ML conference proceedings conference paper supplement (https://proceedings.neurips.cc/paper_files/paper/2020/hash/2c29d89cc56cdb191c60db2f0bae796b-Abstract.html)
Supplement: Supplementary file [file 2c29d89cc56cdb191c60db2f0bae796b-Supplemental.zip]

# Thanks for participating in our study!

You were selected as a possible participant in this study because you are an MTurk worker, and your participation in this research study is voluntary.

## Please read:

For each task, you'll see a **tweet** and an **Artificial Intelligence (AI) prediction** of whether the tweet was positive or negative.

First, we want to know if you think the AI was correct in its decision.

Next, there will be two methods explaining why the AI made this decision.

We want your opinion on **which is a better explanation** for this decision.

Please be sure to select one of the methods for every image.

Note: Sometimes it may be unclear if the tweet is actually positive or negative. Please select whichever makes more sense to you.

## Task 1

An AI algorithm thinks this is a positive tweet.

@spn I am here if you need me

**Correctness:** Do you think the AI classified this tweet correctly?

☐ Yes

☐ No

## Explanation 1: Keywords

The anchor words are the specific words that the AI thinks are most important to the tweet being positive.

Anchor(s): you, if, here, I

## Explanation 2: Highlighted Tweet

The AI highlighted the parts of the tweet that are most important.

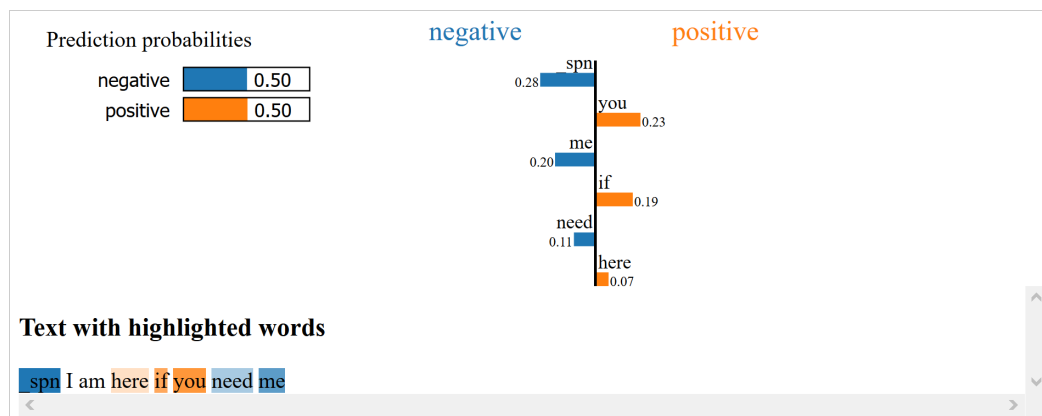

Which explanation is better?

- ☐ Keywords (top)
- ☐ Highlighted Tweet (bottom)

## Task 2

An AI algorithm thinks this is a negative tweet.

Power is out only at my house

**Correctness:** Do you think the AI classified this tweet correctly?

- ☐ Yes
- ☐ No

### Explanation 1: Training Examples

The AI thinks this tweet is very similar to other tweets that it was told are negative.

SIMILAR TWEET #1 (negative):  
Tonights truffle project did not go as planned

SIMILAR TWEET #2 (negative):  
My smelling salts exploded in my purse

SIMILAR TWEET #3 (negative):  
My Dad's brother died. Come cuddle me.

### Explanation 2: Keywords

The anchor words are the specific words that the AI thinks are most important to the tweet being negative.

Anchor(s): only

Which explanation is better?

- ☐ Training Examples (top)
- ☐ Keywords (bottom)

## Task 3

An AI algorithm thinks this is a negative tweet.

Noon+ wake up streak comes to an end tomorrow

**Correctness:** Do you think the AI classified this tweet correctly?

☐ Yes

☐ No

### Explanation 1: Training Examples

The AI thinks this tweet is very similar to other tweets that it was told are negative.

**SIMILAR TWEET #1 (negative):**

Sign up for Internet World is NOT user friendly

**SIMILAR TWEET #2 (negative):**

Its evening here in India! Right now, Studying for exams!

**SIMILAR TWEET #3 (negative):**

Calling it a night. Waking up very early tomorrow

### Explanation 2: Highlighted Tweet

The AI highlighted the parts of the tweet that are most important.

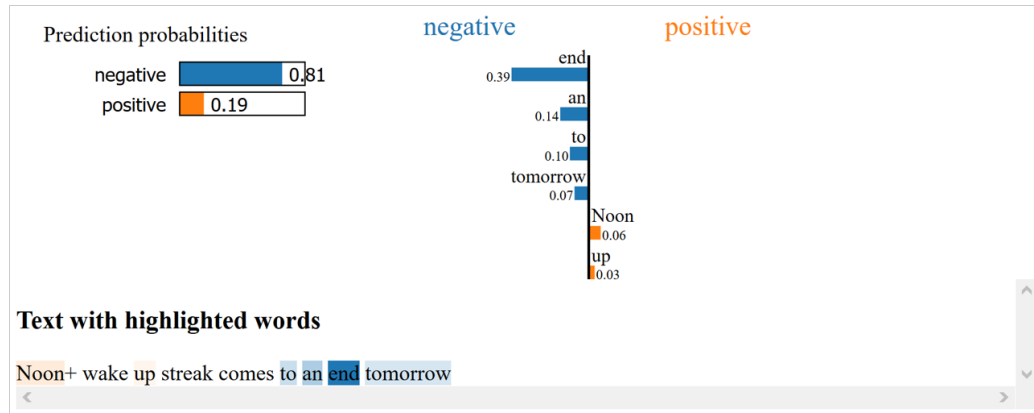

**Which explanation is better?**

☐ Training Examples (top)

☐ Highlighted Tweet (bottom)

## Task 4

An AI algorithm thinks this is a negative tweet.

Happy Father's Day to all of the fathers out there. Wishing wasn't out of town today.

**Correctness:** Do you think the AI classified this tweet correctly?

☐ Yes

☐ No

### Explanation 1: Training Examples

The AI thinks this tweet is very similar to other tweets that it was told are negative.

**SIMILAR TWEET #1 (negative):**

Happy Father's Day to all of the deserving Fathers out there! I miss my Daddy today...

**SIMILAR TWEET #2 (negative):**

Trying to remove a tick from my leg. Shoulda checked myself last night

**SIMILAR TWEET #3 (negative):**

Well you didn't come with the VGA Adapter like the Auction stated, so no 480P for me or you

### Explanation 2: Positive/Negative Analysis

The AI decision thought the red words were positive and the blue words were negative.

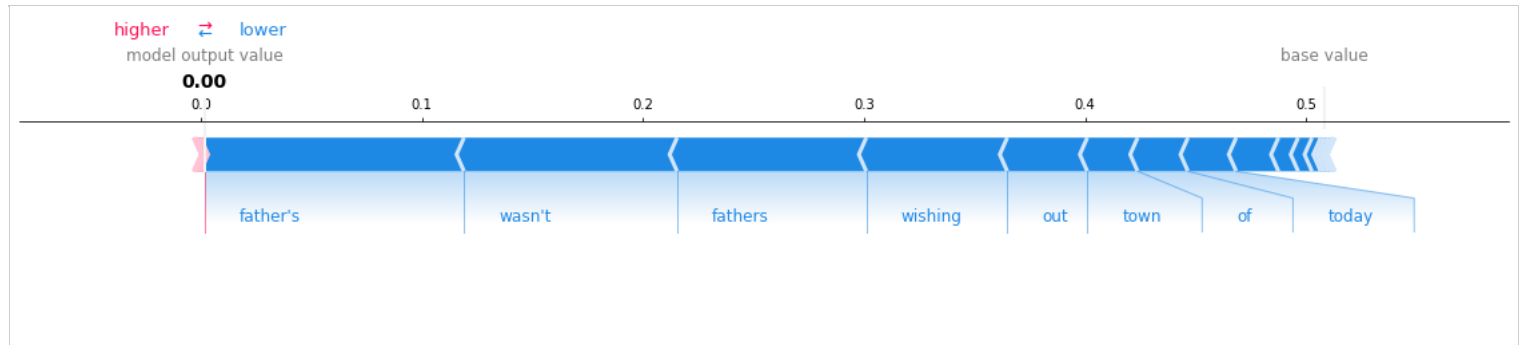

**Which explanation is better?**

☐ Training Examples (top)

☐ Positive/Negative Analysis (bottom)

## Task 5

An AI algorithm thinks this is a negative tweet.

i'm going to meet my Director's Guild Family tomorrow, I miss them so much!

**Correctness:** Do you think the AI classified this tweet correctly?

☐ Yes

☐ No

### Explanation 1: Highlighted Tweet

The AI highlighted the parts of the tweet that are most important.

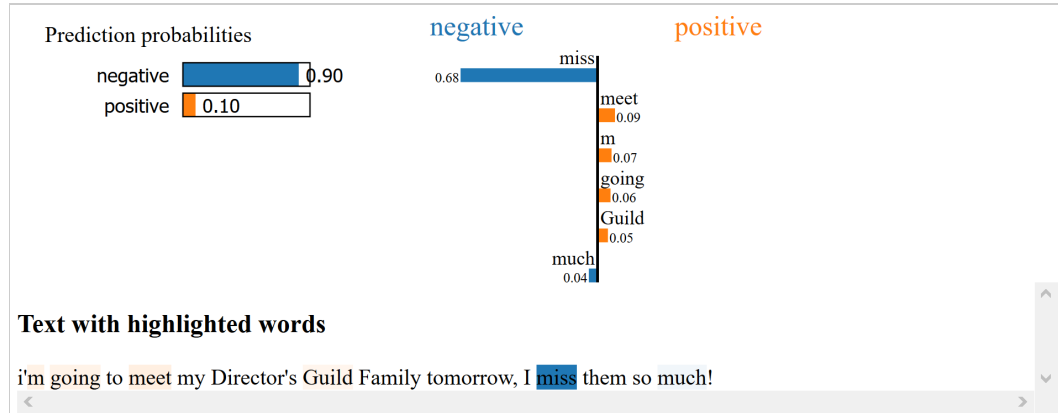

### Explanation 2: Positive/Negative Analysis

The AI decision thought the red words were positive and the blue words were negative.

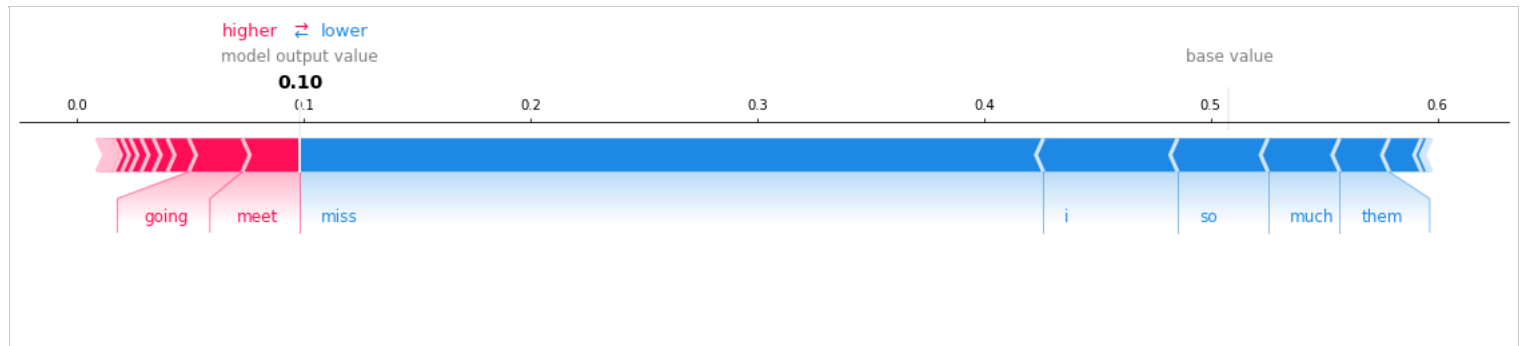

**Which explanation is better?**

☐ Highlighted Tweet (top)

☐ Positive/Negative Analysis (bottom)

## Task 6

An AI algorithm thinks this is a positive tweet.

but of course good things come in small packages woof 2 u & Quinn

**Correctness:** Do you think the AI classified this tweet correctly?

☐ Yes

☐ No

### Explanation 1: Keywords

The anchor words are the specific words that the AI thinks are most important to the tweet being positive.

**Anchor(s):** course

### Explanation 2: Positive/Negative Analysis

The AI decision thought the red words were positive and the blue words were negative.

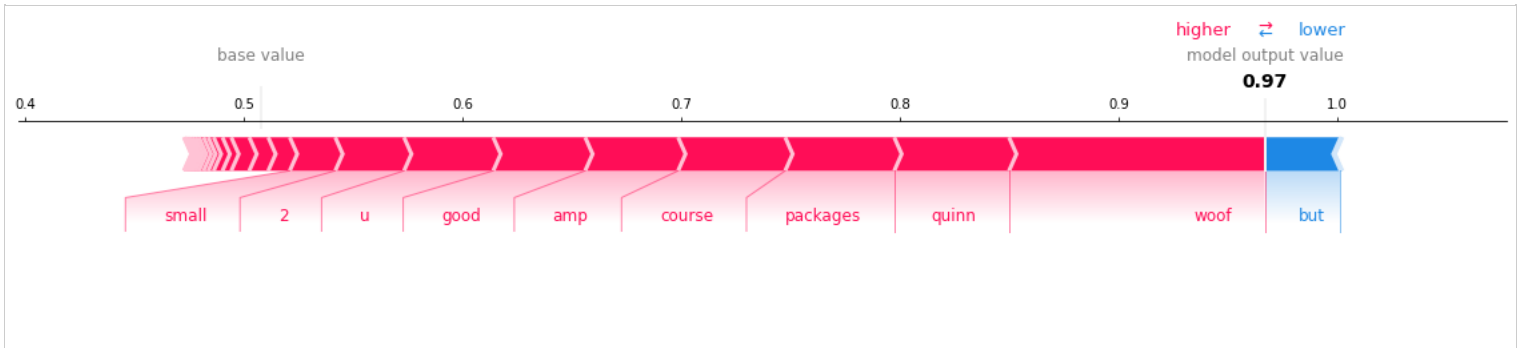

**Which explanation is better?**

☐ Keywords (top)

☐ Positive/Negative Analysis (bottom)

## Task 7

An AI algorithm thinks this is a positive tweet.

actually we are out but im eatin leftovers from last nights PopEyes! its yummy

**Correctness:** Do you think the AI classified this tweet correctly?

☐ Yes

☐ No

### Explanation 1: Keywords

The anchor words are the specific words that the AI thinks are most important to the tweet being positive.

Anchor(s): yummy

## Explanation 2: Highlighted Tweet

The AI highlighted the parts of the tweet that are most important.

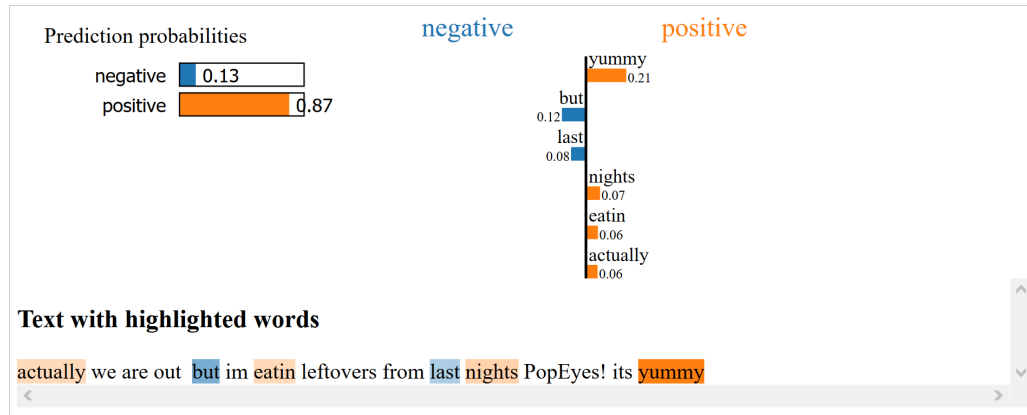

Which explanation is better?

- ☐ Keywords (top)
- ☐ Highlighted Tweet (bottom)

## Task 8

An AI algorithm thinks this is a negative tweet.

Day 2 of #bbplan on hold. Business link were supposed to call me for a tel appointment this morning. No free time to take a call now

**Correctness:** Do you think the AI classified this tweet correctly?

- ☐ Yes
- ☐ No

## Explanation 1: Training Examples

The AI thinks this tweet is very similar to other tweets that it was told are negative.

SIMILAR TWEET #1 (negative):  
please say a prayer for my hubby. Delta lost his 2 bags since Friday and we really can't afford to buy all new clothes and shoes

SIMILAR TWEET #2 (negative):  
my yard outside my window is flooded. I have my plants outside to conserve watering. Can't open sliding door b/c of dog.

SIMILAR TWEET #3 (negative):  
i wanna go get my tattoo now but i have no  
\$\$\$ / dinero / cash / bucks / green / benjamins / change / other synonyms for money...

## Explanation 2: Keywords

The anchor words are the specific words that the AI thinks are most important to the tweet being negative.

Anchor(s): No

Which explanation is better?

- ☐ Training Examples (top)
- ☐ Keywords (bottom)

## Task 9

An AI algorithm thinks this is a negative tweet.

now I donno how to get there to see ya. Google can't figure out a route. sadness

**Correctness:** Do you think the AI classified this tweet correctly?

- ☐ Yes
- ☐ No

## Explanation 1: Training Examples

The AI thinks this tweet is very similar to other tweets that it was told are negative.

SIMILAR TWEET #1 (negative):  
not been well today so no work today or tomorrow, 2 days off but no enjoyment

SIMILAR TWEET #2 (negative):  
sooo sleepy. dont want to be at work but i still have 2 hours left. tummyache

SIMILAR TWEET #3 (negative):  
It wasn't rainy here in DE..it was just kinda cold and cloudy and depressing

## Explanation 2: Highlighted Tweet



The AI highlighted the parts of the tweet that are most important.

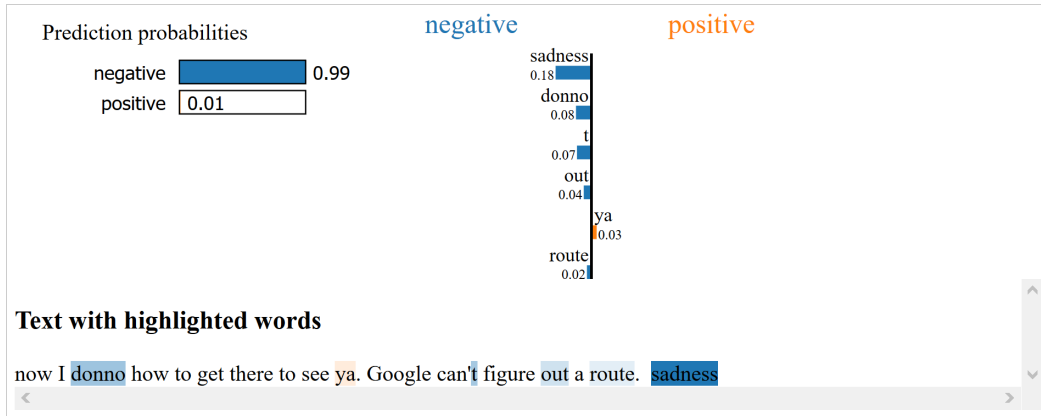

Which explanation is better?

- ☐ Training Examples (top)
- ☐ Highlighted Tweet (bottom)

## Task 10

An AI algorithm thinks this is a negative tweet.

One of my new fish is dieing!

**Correctness:** Do you think the AI classified this tweet correctly?

- ☐ Yes
- ☐ No

### Explanation 1: Training Examples

The AI thinks this tweet is very similar to other tweets that it was told are negative.

**SIMILAR TWEET #1 (negative):**

Going to Maryland! To a funeral...

**SIMILAR TWEET #2 (negative):**

The download page of beta is empty.

**SIMILAR TWEET #3 (negative):**

Undoing my perfect, intricate hair for prom is painful

### Explanation 2: Positive/Negative Analysis

The AI decision thought the red words were positive and the blue words were negative.

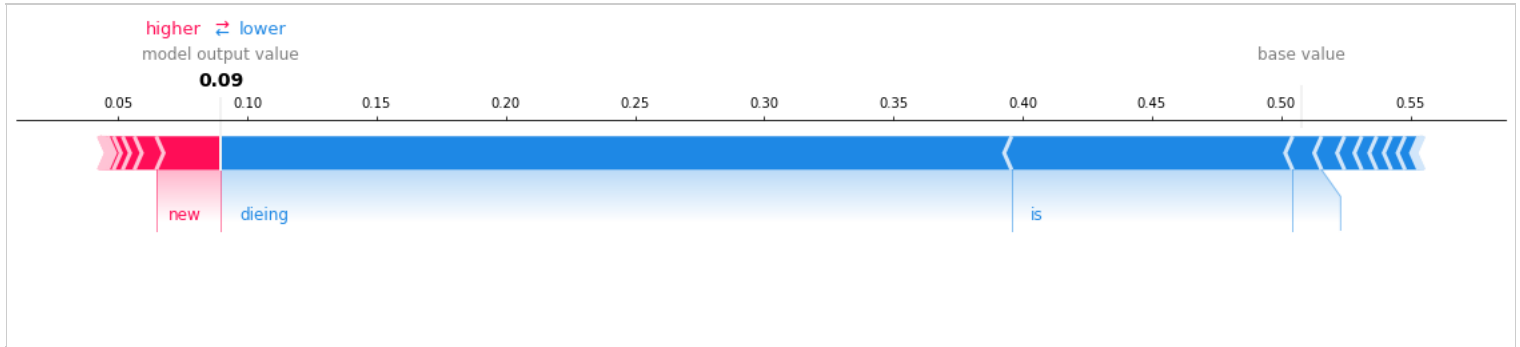

Which explanation is better?

- ☐ Training Examples (top)
- ☐ Positive/Negative Analysis (bottom)

## Task 11

An AI algorithm thinks this is a positive tweet.

Please follow @Milano i know its not #followfriday but do it anyway!

**Correctness:** Do you think the AI classified this tweet correctly?

- ☐ Yes
- ☐ No

### Explanation 1: Highlighted Tweet

The AI highlighted the parts of the tweet that are most important.

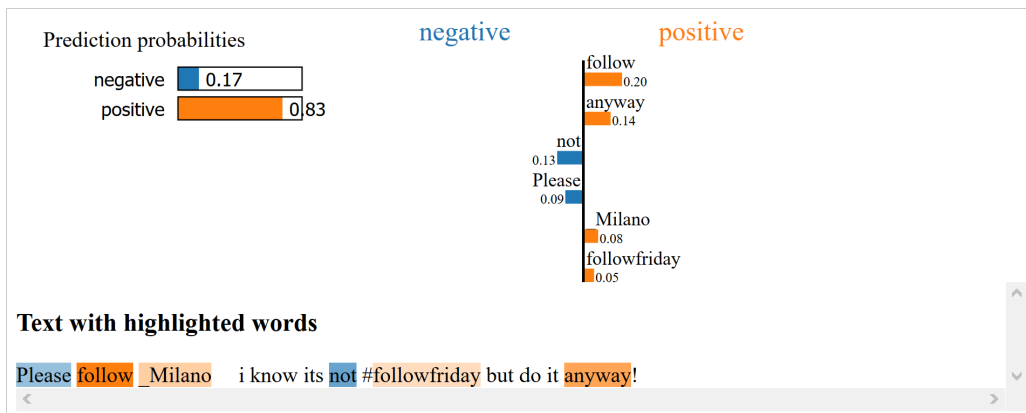

### Explanation 2: Positive/Negative Analysis

The AI decision thought the red words were positive and the blue words were negative.

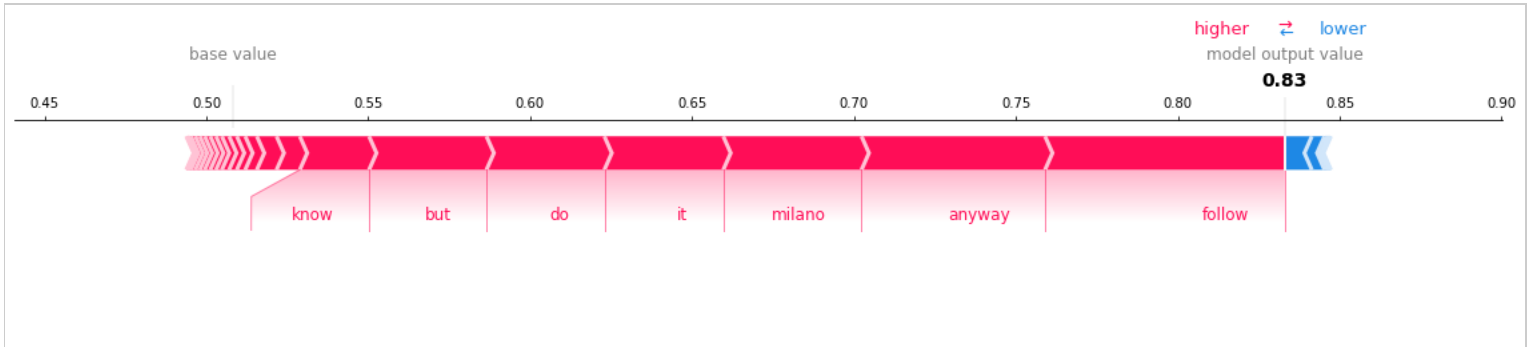

Which explanation is better?

- ☐ Highlighted Tweet (top)
- ☐ Positive/Negative Analysis (bottom)

## Task 12

An AI algorithm thinks this is a negative tweet.

Hd enough of tit for tat with the kids. I'll nvr win. They came up with the silliest games like "who will blink first?" No bets on me

**Correctness:** Do you think the AI classified this tweet correctly?

- ☐ Yes
- ☐ No

### Explanation 1: Keywords

The anchor words are the specific words that the AI thinks are most important to the tweet being negative.

Anchor(s): nvr, No

### Explanation 2: Positive/Negative Analysis

The AI decision thought the red words were positive and the blue words were negative.

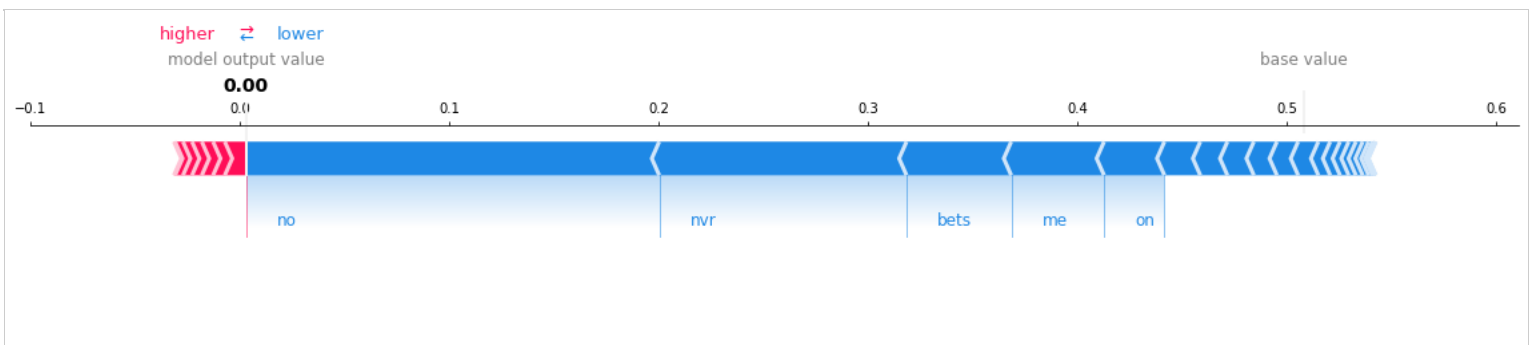

Which explanation is better?

- ☐ Keywords (top)
- ☐ Positive/Negative Analysis (bottom)

Note: only click submit once, or your entry may be lost.

Submit
